# Supplementary material
Source: publisher figshare collection journal article supplement (https://tandf.figshare.com/ndownloader/files/9347554)
Supplement: Supplementary file 1 [file 9347554]

**Improvement of anti-biofouling properties of hollow fiber membranes with bismuth-BAL chelate (BisBAL)**

F.N.S. Yavuza,b, R. Sengur-Tasdemirb,c, T. Turkena,b, G. M. Urpera,b, I. Koyuncua,b,c,*

a Department of Environmental Engineering, Istanbul Technical University, 34469 Istanbul, Turkey

b National Research Center on Membrane Technologies, Istanbul Technical University, 34469 Istanbul, Turkey

c Department of Nanoscience and Nanoengineering, Istanbul Technical University, 34469 Istanbul, Turkey

This supplementary data consists of one page and one figure.

**Antibacterial Activity of BisBAL**

Antibacterial activity of BisBAL addition was also determined by using *E.coli.* Results of the experiment was given in Figure 1S. Compared to pristine membranes, growth of *E.coli* was inhibited after the addition of BisBAL.


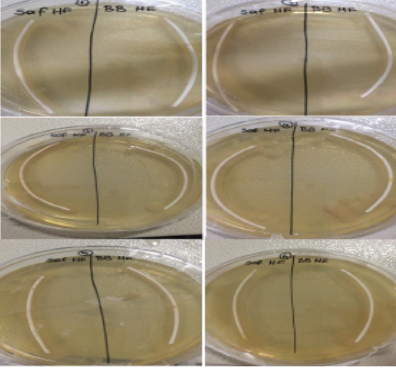


**c**)

**b**)

**a**)

BisBAL

pristine

BisBAL

pristine

Figure 1S: Growth of *E.coli*  on the HF membranes on a) 1st day, b) 3rd day, c) 6th day
